# Supplementary material for: Computational identification of key genes that may regulate gene expression reprogramming in Alzheimer’s patients
Source: PLoS One. 2019 Sep 23;14(9):e0222921. doi: 10.1371/journal.pone.0222921 (PMC6756555; doi:10.1371/journal.pone.0222921)
Supplement: S5 Table — (XLSX) [file pone.0222921.s009.xlsx]

## Sheet: Sheet1
Superior Frontal Gyrus Supplementary table
Probe set	Accession number	Entrez ID	Gene symbol	Gene name
201148_s_at	AW338933	7078	TIMP3	TIMP Metallopeptidase Inhibitor 3
223757_at	AF305836	64150	DIO3OS	lncRNA
225239_at	AI355441	283131	NEAT1	lncRNA
233025_at	AU146117	23037	PDZD2	PDZ Domain Containing 2
239013_at	BG499941			Unknown
240496_at	AI652000	3757	KCNH2	Potassium voltage-gated channel, subfamily H (eag-related), member 2
241762_at	BF244402	114907	FBXO32	F-Box Protein 32
243915_at	AW130385			Unknown
